# Supplementary material for: A quasi-experimental eye-tracking study investigating the relationship between professional vision and the dispositions for inclusive teaching
Source: Frontiers journal article supplement (doi:10.3389/feduc.2025.1635351), 2025-07-14
Supplement: Data_Sheet_1.docx [file Data_Sheet_1.docx]

Supplementary Material

Table 6
*Masterrating*

|  | Event | Begin (mm:ss) | End (mm:ss) | **Who?** | **What?** | **Why?** | **In what way?** |
| --- | --- | --- | --- | --- | --- | --- | --- |
| **Video 1** | **Group work scenario in the sense of station work** | | | | | | |
|  | V1_1 | 00:48 | 01:10 | Student on the left in black T-shirt | Pupil is still busy with the QR code during the teacher's explanation | The student only looks forward very briefly at the end of the explanation and is busy with the QR code until then. From 0:58 onwards, the pupil is the only one not looking forward. | If the pupil cannot follow the explanation because she is still busy with the previous step, this could lead to comprehension problems in the work phase. The teacher should give the pupils time to complete the work step. |
|  | V1_2 | 01:48 | 02:18 | Girl on the right, visibly frustrated | Teacher gives feedback to the two students. | Teacher does not give appropriate feedback to students. | Pupils need to know what they have done well and what they have not done well, so feedback should be differentiated in terms of subject. Praise motivates pupils, belittling and comparing unsettles and demotivates. |
| **Video 2** | **Individual work scenario in the sense of silent work** | | | | | | |
|  | V2_1 | 00:00 | 0:50 | Table second from the front left busy with tablet. | Teacher solves the task on the blackboard herself. | Class is restless. | The students could have presented the results of their work from situation 1 to each other. This makes the students active, they practise presenting and the different examples make the lesson more challenging and interesting. |
|  | V2_2 | 00:50 | 01:40 | Both pupils in the 2nd row on the left, from both pupils in the 1st row on the right and all pupils in the last row | The student shows something on the tablet/smartphone to the person sitting next to her, the two talk, and gradually several conversations arise in the room. It is unclear whether it is about the LP's explanation or topics unrelated to the lesson. | The conversation starts with 2 students at the beginning (00:50) and ends with a total of 8 students talking. | First, the teacher should address the fact that the pupils are not paying attention. Since it is unclear whether the conversation is about the lesson topic or about non-lesson topics, it is unclear whether the pupils are bored and possibly underchallenged or overchallenged. In both cases, the pupils cannot be adequately supported. This could be clarified through a discussion between the pupils and the teacher. |
|  | V2_3 | 01:05 | 01:14 | Table at the back left, boy shows another what's on tablet | Teacher solves the task on the blackboard herself. | Class is restless. | The students could have presented the results of their work from situation 1 to each other. This makes the students active, they practise presenting and the different examples make the lesson more challenging and interesting. |
| **Video 3** | **Individual work scenario in the sense of silent work** | | | | | | |
|  | V3_1 | 02:50 | 02:59 | Boy in front left turns around, he is shown something funny? |  |  |  |
|  | V3_2 | 03:10 | 03:42 | Young table second from the front left turns to the back and talks (is interrupted by the teacher's question) |  |  |  |
| **Video 4** | **Frontal teaching in the sense of a teacher lecture** | | | | | | |
|  | V4_1 | 00:00 | 00:08 | Entertainment front table right |  |  |  |
|  | V4_2 | 00:10 | 00:22 | Pupils 2nd row left | Instructor asks a question to activate the students' prior Pedagogical Teaching Knowledge. Pupil calls out the answer to the class without reporting. The teacher is satisfied with the answer, but does not check whether the other pupils have understood it. | The student gives his or her answer without reporting beforehand and the teacher does not respond to this behavior at all. | The activation of prior Pedagogical Teaching Knowledge serves to cognitively activate as many pupils as possible. For example, the teacher could have asked another pupil to repeat the answer in their own words. If the other pupils have not understood the answer, it would be useful to explain it in more detail so that the pupils can link the following content to their previous Pedagogical Teaching Knowledge. |
|  | V4_3 | 00:43 | 00:47 | Lack of understanding on the right, second table from the front (girl on the right) |  |  |  |
|  | V4_4 | 00:59 | 02:23 | Teacher, pupil and class copying. | Teacher writes on the board and the class copies from the board. One pupil is asked to name the y-values. | The student from situation 1 puts his head on the table, bored (underchallenged). Class becomes restless. | See alternative described in situation 1. |
|  | V4_5 | 01:06 | 01:12 | Girl in the front right turns around |  |  |  |
|  | V4_6 | 01:56 | 02:14 | Rear right entertainment |  |  |  |
|  | V4_7 | 02:07 | 02:21 | Entertainment front right |  |  |  |
|  | V4_8 | 02:11 | 02:22 | "Clarifying" conversation at the back left |  |  |  |
|  | V4_9 | 02:24 | 03:05 | Teacher and pupil with head on the bench and class copying. | Teacher asks students to name the y-values for the cosine. | Pupil solves the task without errors, this proves the thesis that the pupil is underchallenged. | For differentiation options, see alternative described in situation 1, so that the pupil is occupied and does not put his head on the table for over a minute, bored. |
|  | V4_10 | 03:00 | 03:05 | Adjustment of the transcript front right |  |  |  |

*Note.* In total, there were 17 events in the four videos. What, why and in what way are the questions that should be answered by the teachers, if possible.

Table 7
*Results of the Multiple Regression Analysis for RQ 1 for Video 1*

| Parameter | Estimate | SE | 95% CL | | *t* | *p* |
| --- | --- | --- | --- | --- | --- | --- |
| *LL* | *UL* |
| **Total fixation duration** |  |  |  |  |  |  |
| (Intercept) | 1.64 | 2.02 | -2.40 | 5.67 | 0.81 | 0.42 |
| Attitudes towards Inclusion | 0.16 | 0.19 | -0.23 | 0.55 | 0.81 | 0.42 |
| Self-efficacy Beliefs on Adaptive Teaching | 0.39 | 0.50 | -0.61 | 1.38 | 0.77 | 0.44 |
| Pedagogical Teaching Knowledge | -0.02 | 0.03 | -0.07 | 0.03 | -0.68 | 0.50 |
| **Fixation count** |  |  |  |  |  |  |
| (Intercept) | 8.57 | 4.55 | -0.49 | 17.64 | 1.88 | 0.06 |
| Attitudes towards Inclusion | 0.54 | 0.44 | -0.34 | 1.42 | 1.22 | 0.23 |
| Self-efficacy Beliefs on Adaptive Teaching | -0.39 | 1.14 | -2.66 | 1.89 | -0.34 | 0.74 |
| Pedagogical Teaching Knowledge | -0.07 | 0.06 | -0.19 | 0.05 | -1.16 | 0.25 |

*Note.* *N* = 79. CI = confidence interval; *LL* = lower limit; *UL* = upper limit; dferror = 75.
* *p* < .05. ***p* < .01. ****p* < .001.

Table 8
*Results of the Multiple Regression Analysis for RQ 1 for Video 2*

| Parameter | Estimate | SE | 95% CL | | *t* | *p* |
| --- | --- | --- | --- | --- | --- | --- |
| *LL* | *UL* |
| **Total fixation duration** |  |  |  |  |  |  |
| (Intercept) | 6.35 | 2.60 | 1.17 | 11.52 | 2.44 | 0.02 |
| Attitudes towards Inclusion | 0.12 | 0.25 | -0.37 | 0.60 | 0.47 | 0.64 |
| Self-efficacy Beliefs on Adaptive Teaching | -0.06 | 0.64 | -1.34 | 1.22 | -0.10 | 0.92 |
| Pedagogical Teaching Knowledge | -0.03 | 0.03 | -0.10 | 0.03 | -1.05 | 0.30 |
| **Fixation count** |  |  |  |  |  |  |
| (Intercept) | 25.99 | 8.35 | 9.37 | 42.62 | 3.11 | 0.00 |
| Attitudes towards Inclusion | -0.21 | 0.80 | -1.81 | 1.38 | -0.27 | 0.79 |
| Self-efficacy Beliefs on Adaptive Teaching | -2.47 | 2.10 | -6.65 | 1.71 | -1.18 | 0.24 |
| Pedagogical Teaching Knowledge | 0.03 | 0.11 | -0.19 | 0.24 | 0.23 | 0.82 |

*Note.* *N* = 79. CI = confidence interval; *LL* = lower limit; *UL* = upper limit; dferror = 75.
* *p* < .05. ***p* < .01. ****p* < .001.

Table 9
*Results of the Multiple Regression Analysis for RQ 1 for Video 3*

| Parameter | Estimate | SE | 95% CL | | *t* | *p* |
| --- | --- | --- | --- | --- | --- | --- |
| *LL* | *UL* |
| **Total fixation duration** |  |  |  |  |  |  |
| (Intercept) | 6.24 | 2.92 | 0.42 | 12.06 | 2.14 | 0.04 |
| Attitudes towards Inclusion | -0.25 | 0.28 | -0.81 | 0.31 | -0.88 | 0.38 |
| Self-efficacy Beliefs on Adaptive Teaching | 0.48 | 0.73 | -0.99 | 1.94 | 0.65 | 0.52 |
| Pedagogical Teaching Knowledge | -0.02 | 0.04 | -0.09 | 0.06 | -0.46 | 0.65 |
| **Fixation count** |  |  |  |  |  |  |
| (Intercept) | 22.65 | 10.10 | 2.53 | 42.77 | 2.24 | 0.03 |
| Attitudes towards Inclusion | -0.66 | 0.97 | -2.59 | 1.27 | -0.68 | 0.50 |
| Self-efficacy Beliefs on Adaptive Teaching | -0.95 | 2.54 | -6.01 | 4.10 | -0.38 | 0.71 |
| Pedagogical Teaching Knowledge | 0.11 | 0.13 | -0.15 | 0.37 | 0.84 | 0.40 |

*Note.* *N* = 79. CI = confidence interval; *LL* = lower limit; *UL* = upper limit; dferror = 75.
* *p* < .05. ***p* < .01. ****p* < .001.

Table 10
*Results of the Multiple Regression Analysis for RQ 1 for Video 4*

| Parameter | Estimate | SE | 95% CL | | *t* | *p* |
| --- | --- | --- | --- | --- | --- | --- |
| *LL* | *UL* |
| **Total fixation duration** |  |  |  |  |  |  |
| (Intercept) | 3.87 | 1.00 | 1.88 | 5.86 | 3.88 | 0.00 |
| Attitudes towards Inclusion | 0.03 | 0.10 | -0.16 | 0.23 | 0.36 | 0.72 |
| Self-efficacy Beliefs on Adaptive Teaching | 0.00 | 0.25 | -0.50 | 0.50 | -0.02 | 0.99 |
| Pedagogical Teaching Knowledge | -0.03 | 0.01 | -0.05 | 0.00 | -1.99 | 0.05 |
| **Fixation count** |  |  |  |  |  |  |
| (Intercept) | 11.59 | 2.78 | 6.06 | 17.13 | 4.17 | 0.00 |
| Attitudes towards Inclusion | 0.07 | 0.27 | -0.47 | 0.60 | 0.24 | 0.81 |
| Self-efficacy Beliefs on Adaptive Teaching | -0.55 | 0.70 | -1.94 | 0.84 | -0.79 | 0.43 |
| Pedagogical Teaching Knowledge | -0.04 | 0.04 | -0.11 | 0.03 | -1.05 | 0.30 |

*Note.* *N* = 79. CI = confidence interval; *LL* = lower limit; *UL* = upper limit; dferror = 75.
* *p* < .05. ***p* < .01. ****p* < .001.

Table 11
*Results of the Multiple Regression Analysis for RQ 2 for the Different Videos*

| Parameter | Estimate | SE | 95% CL | | *t* | *p* |
| --- | --- | --- | --- | --- | --- | --- |
| *LL* | *UL* |
| **Video 1** |  |  |  |  |  |  |
| (Intercept) | 1.95 | 42.90 | -83.51 | 87.40 | 0.05 | 0.96 |
| Attitudes towards Inclusion | 3.72 | 4.12 | -4.49 | 11.93 | 0.90 | 0.37 |
| Self-efficacy Beliefs on Adaptive Teaching | -1.72 | 10.78 | -23.19 | 19.75 | -0.16 | 0.87 |
| Pedagogical Teaching Knowledge | 0.11 | 0.56 | -1.00 | 1.23 | 0.20 | 0.84 |
| **Video 2** |  |  |  |  |  |  |
| (Intercept) | 1.30 | 42.94 | -84.24 | 86.85 | 0.03 | 0.98 |
| Attitudes towards Inclusion | 3.74 | 4.13 | -4.48 | 11.96 | 0.91 | 0.37 |
| Self-efficacy Beliefs on Adaptive Teaching | -1.61 | 10.79 | -23.11 | 19.89 | -0.15 | 0.88 |
| Pedagogical Teaching Knowledge | 0.12 | 0.56 | -1.00 | 1.23 | 0.21 | 0.84 |
| **Video 3** |  |  |  |  |  |  |
| (Intercept) | 1.61 | 42.93 | -83.90 | 87.12 | 0.04 | 0.97 |
| Attitudes towards Inclusion | 3.74 | 4.12 | -4.48 | 11.95 | 0.91 | 0.37 |
| Self-efficacy Beliefs on Adaptive Teaching | -1.76 | 10.79 | -23.25 | 19.73 | -0.16 | 0.87 |
| Pedagogical Teaching Knowledge | 0.12 | 0.56 | -0.99 | 1.24 | 0.22 | 0.83 |
| **Video 4** |  |  |  |  |  |  |
| (Intercept) | 1.09 | 43.00 | -84.58 | 86.75 | 0.03 | 0.98 |
| Attitudes towards Inclusion | 3.72 | 4.13 | -4.51 | 11.95 | 0.90 | 0.37 |
| Self-efficacy Beliefs on Adaptive Teaching | -1.62 | 10.80 | -23.15 | 19.90 | -0.15 | 0.88 |
| Pedagogical Teaching Knowledge | 0.12 | 0.56 | -1.00 | 1.24 | 0.22 | 0.83 |

*Note.* *N* = 79. CI = confidence interval; *LL* = lower limit; *UL* = upper limit; dferror = 75. Performance = Recognition of Critical Incidents as – verbalized; Multiple R² = .01-.05.
* *p* < .05. ***p* < .01. ****p* < .001.

Table 12
*Results of the Linear Regression Analysis for RQ 3 for the Different Videos*

| Parameter | Estimate | SE | 95% CL | | *t* | *p* |
| --- | --- | --- | --- | --- | --- | --- |
| *LL* | *UL* |
| **Video 1** |  |  |  |  |  |  |
| (Intercept) | 51.28 | 14.77 | 21.84 | 80.71 | 3.47 | 0.00*** |
| Fixation Count | -2.71 | 1.26 | -5.21 | -0.21 | -2.16 | 0.03* |
| Total Fixation Duration | 1.21 | 2.29 | -3.36 | 5.78 | 0.53 | 0.60 |
| **Video 2** |  |  |  |  |  |  |
| (Intercept) | 50.20 | 16.03 | 18.26 | 82.13 | 3.13 | 0.00** |
| Fixation Count | -2.35 | 1.19 | -4.72 | 0.02 | -1.97 | 0.05 |
| Total Fixation Duration | -0.04 | 1.71 | -3.44 | 3.36 | -0.02 | 0.98 |
| **Video 3** |  |  |  |  |  |  |
| (Intercept) | 30.66 | 10.77 | 18.26 | 82.13 | 2.85 | 0.00** |
| Fixation Count | -0.95 | 0.56 | -4.72 | 0.02 | -1.68 | 0.10 |
| Total Fixation Duration | 1.79 | 1.95 | -3.44 | 3.36 | 0.92 | 0.36 |
| **Video 4** |  |  |  |  |  |  |
| (Intercept) | 25.26 | 16.37 | 18.26 | 82.13 | 1.54 | 0.13 |
| Fixation Count | -2.31 | 1.72 | -4.72 | 0.02 | -1.35 | 0.18 |
| Total Fixation Duration | 5.47 | 4.71 | -3.44 | 3.36 | 1.61 | 0.25 |

*Note.* *N* = 79. CI = confidence interval; *LL* = lower limit; *UL* = upper limit; dferror = 75.
* *p* < .05. ***p* < .01. ****p* < .001.

**Table 13**

*Questionnaires/Test*

| Subscales | | Number of Items | Example items a |
| --- | --- | --- | --- |
| Informal learning opportunities | | | |
| Child and youth work | | 11 | “I have experiences in child and youth care.” |
| Teaching children and youth | | 9 | “I have XX years of experience in teaching children and/or adolescents.” |
| Social commitment | | 10 | “In my free time, I am committed to social or political goals or for other people (e.g. climate protection, youth work, safety and order in the neighborhood).” |
|  | | | |
| Attitudes Towards Inclusive Education in the Population (Lüke & Grosche, 2018) | | | |
|  | 14 | | “I suspect that an inclusive school system could improve education for all children.” |
|  | | | |
| Self-efficacy Beliefs on Adaptive Teaching of adaptive teaching in heterogeneous classrooms (Meschede & Hardy, 2020) | | | |
| Assessment of preconditions to learning | | 8 | “I feel able to find adequate forms of assessment for different purposes.” |
| Differentiation and support | | 8 | “I am confident to enable independent learning on different levels.” |
| Cooperative learning | | 6 | “I am confident that I can encourage students with different preconditions to support each other.” |
| Attitudes towards inclusive education in the population | | 14 | “I think an inclusive education system is fairer than the current system.” |
|  | | | |
| Pedagogical Teaching Knowledge (König & Blömeke, 2009) | | | |
| Handling heterogeneity | | 4 | “Which of the following objectives demands for internal or external differentiation?” |
| Structuring | | 3 | “What is a spiral curriculum?” |
| Classroom management | | 4 | “What can a teacher do in advance to prevent disruptions in class?” |
| Motivation | | 3 | “Which of the following cases can be accounted to intrinsic motivation, which can account for extrinsic motivation?” |
| Assessment | | 4 | “On a cognitive level, giftedness is characterized by an IQ of: …” |

a Translated Items. Originals in German.
